# Supplementary material for: Anti-Proliferative and Pro-Apoptotic Effects of Digested Aglianico Grape Pomace Extract in Human Colorectal Cancer Cells
Source: MDPI journal article supplement (doi:10.3390/molecules27206791), 2022-10-11
Supplement: s1 [file s1]

## Supplementary Materials

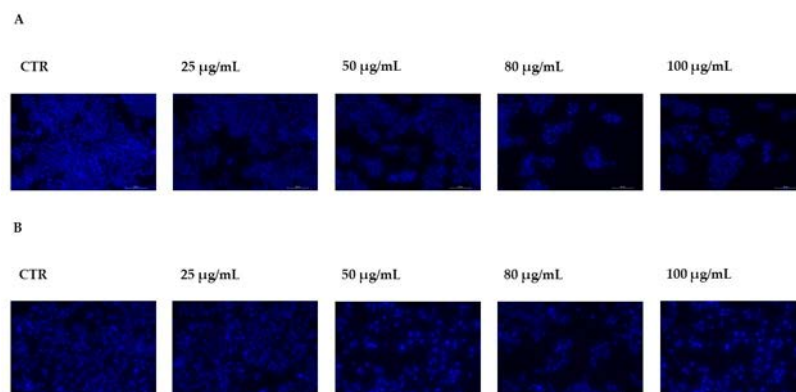

**Figure S1.** Image of HT29 (A) and SW480 (B) cells, treated with increasing concentrations of Aglianico GP gastrointestinal digested extract compared to the control, stained with Hoechst 33342.

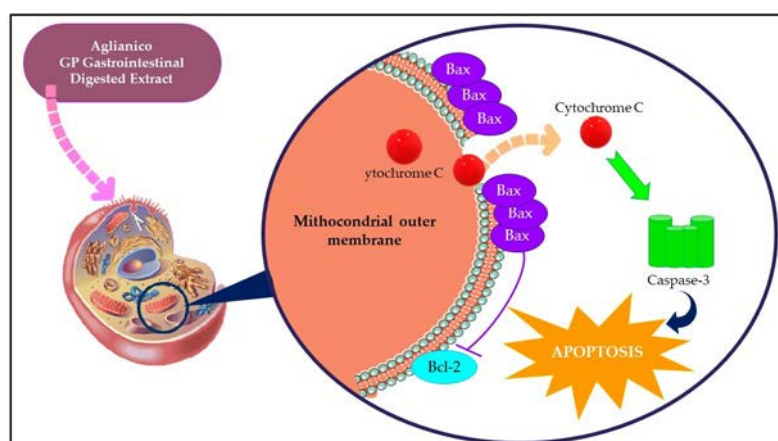

**Figure S2.** Mitochondrial apoptosis signals by Aglianico GP gastrointestinal digested extract.
